# Supplementary material
Source: PubMed Central journal article supplement (PMC556221)

A)

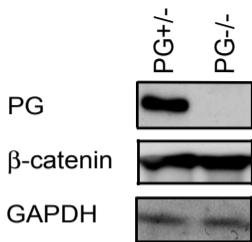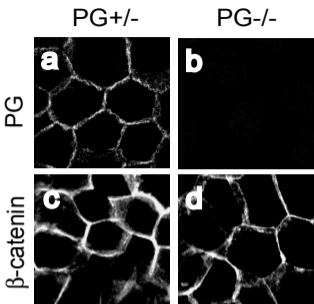

B)

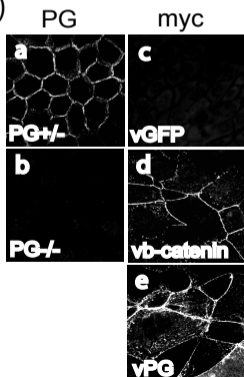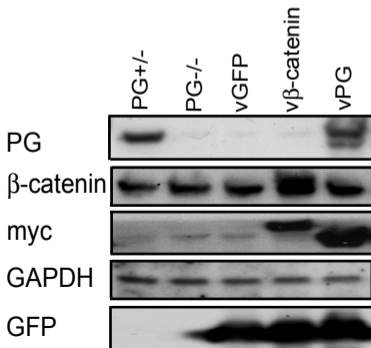

Supplement: pnas_102_15_5420__1.pdf [file pnas_102_15_5420__1.pdf]
